# Supplementary material for: A cobalt-substituted Keggin-type polyoxometalate for catalysis of oxidative aromatic cracking reactions in water
Source: Royal Society of Chemistry journal article supplement (doi:10.1039/d0cy01758b), 2020-01-01
Supplement: d0cy01758b1.pdf [file d0cy01758b1.pdf]

**Electronic Supplementary Information**  
**for**  
**A cobalt-substituted Keggin-type polyoxometalate for catalysis of**  
**oxidative aromatic cracking reactions in water**

Yoshihiro Shimoyama,<sup>a</sup> Satoru Tamura,<sup>b</sup> Yasutaka Kitagawa,<sup>c</sup> Dachao Hong,<sup>\*,a,d</sup>  
Yoshihiro Kon<sup>a,d</sup>

<sup>a</sup> *Interdisciplinary Research Center for Catalytic Chemistry, National Institute of Advanced Industrial Science and Technology (AIST), Tsukuba, Ibaraki 305-8565, Japan*

<sup>b</sup> *Institute for Energy and Material Food Resources, Technology Innovation Division, Panasonic Corporation, 1006 Kadoma, Kadoma City, Osaka 571-8508, Japan*

<sup>c</sup> *Department of Chemistry, Graduate School of Science, Osaka University, 1-1 Machikaneyama-cho, Toyonaka, Osaka 560-0043, Japan*

<sup>d</sup> *Global Zero Emission Research Center, National Institute of Advanced Industrial Science and Technology (AIST), Tsukuba, Ibaraki 305-8565, Japan*

\* To whom correspondence should be addressed.  
E-mail: hong-d@aist.go.jp (D. H.)

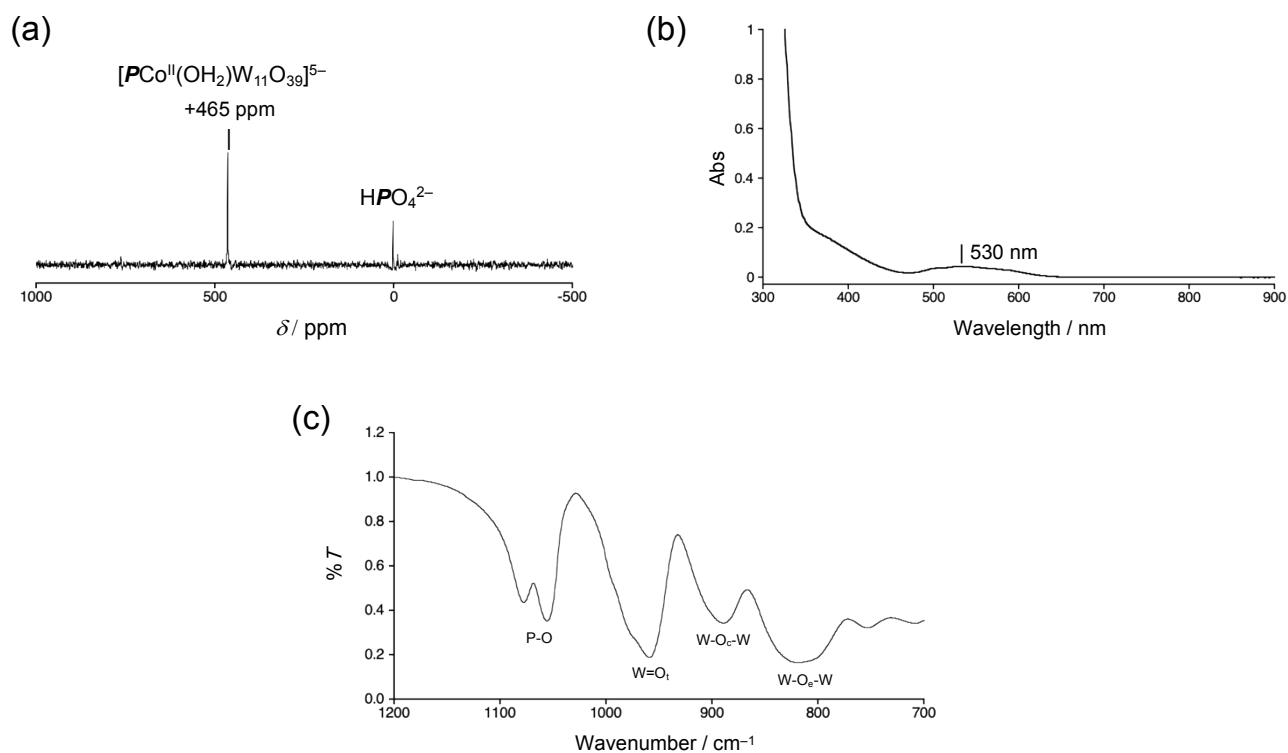

**Fig. S1** Characterizations of  $\text{K}_5[\text{PCo}^{\text{II}}(\text{OH}_2)\text{W}_{11}\text{O}_{39}]$  by (a) Paramagnetic  $^{31}\text{P}$  NMR spectrum in  $\text{D}_2\text{O}$  using  $\text{Na}_2\text{HPO}_4$  as an internal standard, (b) UV-vis spectrum in water and (c) FT-IR spectrum in a KBr pellet.

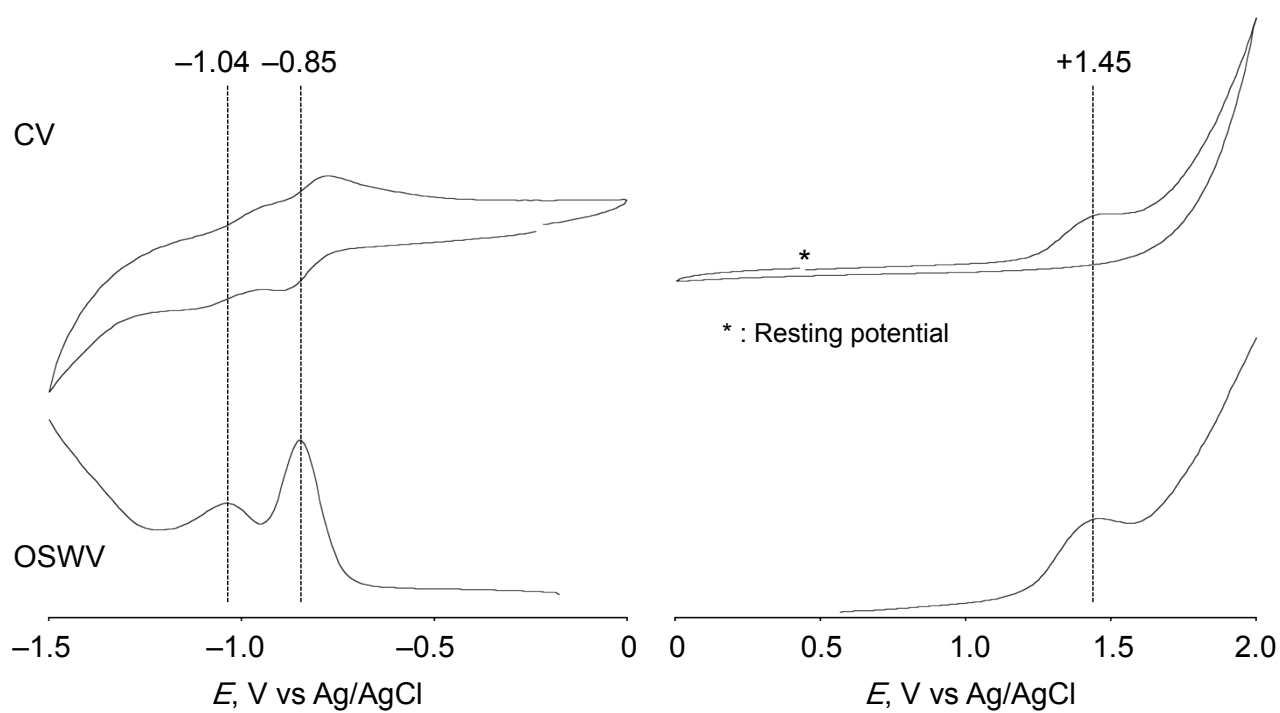

**Fig. S2** Electrochemical measurements of **Co-POM** in water. Solvent: water (pH 6.0), electrolyte: 50 mM Na<sub>2</sub>SO<sub>4</sub>, temp.: 25 °C, working electrode: Glassy carbon, counter electrode: Pt disk, reference electrode: Ag/AgCl, scan rate: 100 mV/s. CV: Cyclic voltammograms, OSWV: Osteryoung square-wave voltammograms.

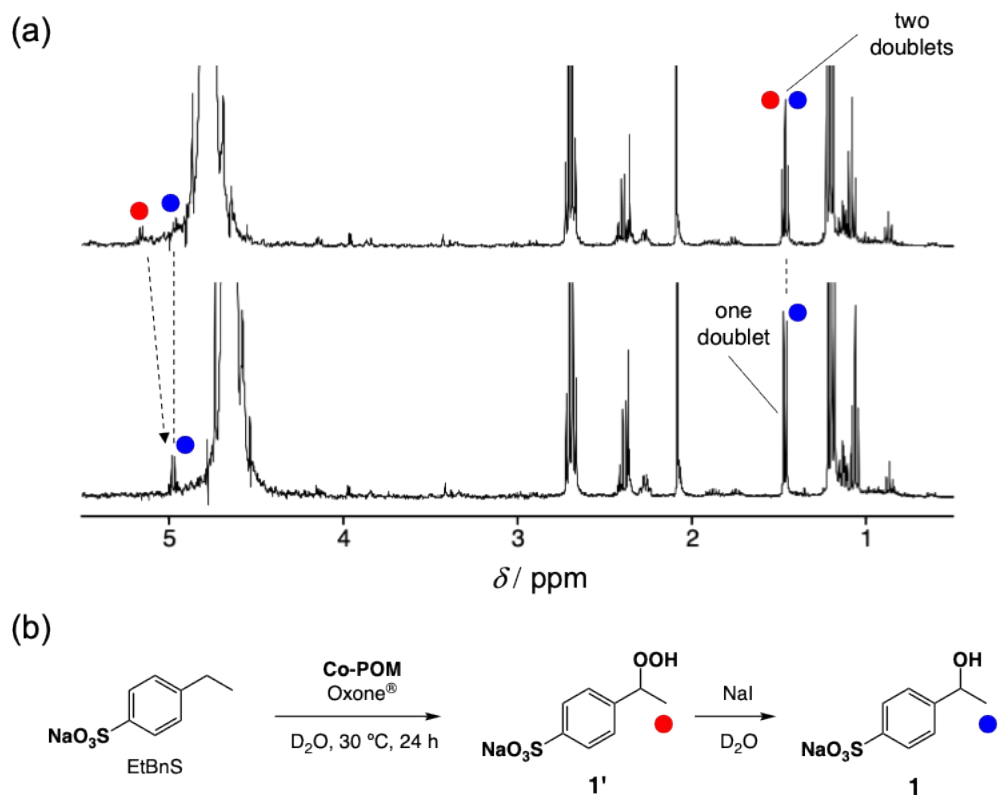

**Fig. S3** (a)  $^1\text{H}$  NMR spectra of the reaction mixture in the catalytic OAC reaction of EtBnS by **Co-POM** (top) before and (bottom) after addition of excess NaI. (b) Schematic representation for peroxidation of EtBnS to afford **1'** and subsequent reduction of **1'** into **1** by NaI. The concentration of **1** has been unified with that of **1'**.

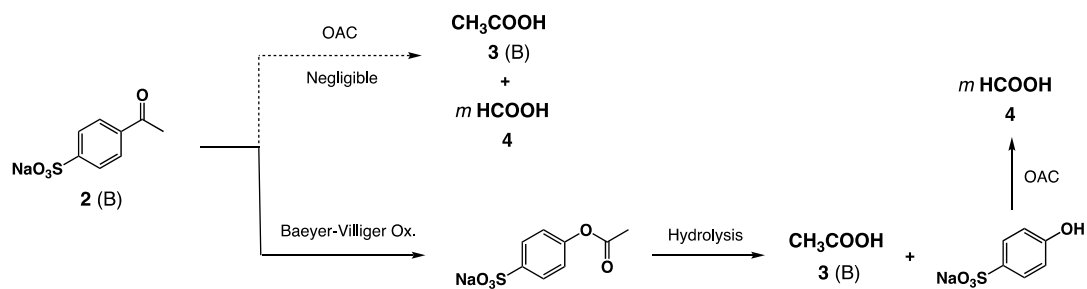

| Substrate | Yield, %                 |                          |
|-----------|--------------------------|--------------------------|
|           | Acetic acid ( <b>3</b> ) | Formic acid ( <b>4</b> ) |
|           | 3.1                      | 0.7                      |
|           | n. d.                    | 9.6                      |

**Fig. S4.** Overoxidation pathway of sodium 4-acetylbenzenesulfonate (**2**) to afford acetic acid through Baeyer-Villiger oxidation of **2** and the yields of acetic and formic acid in the catalytic oxidation of **2** and sodium 4-hydroxybenzenesulfonate in D<sub>2</sub>O. Reaction conditions: [Co-POM]: 0.20 mM, [NaHCO<sub>3</sub>]: 1.0 M, [Oxone<sup>®</sup>]: 0.30 M, [Subst.]: 0.10 M, temp.: 30 °C, reaction time: 24 h.

Comment: Acetic acid obtained from oxidative cracking of **2** in this work can be negligible because the electrophilic attack of the Co<sup>III</sup>-oxyl species to the aromatic ring of **2** having electron-withdrawing groups (sulfonate and acetyl) is unfavorable in the reaction conditions as suggested by the Hammett plots in Fig. 4d.

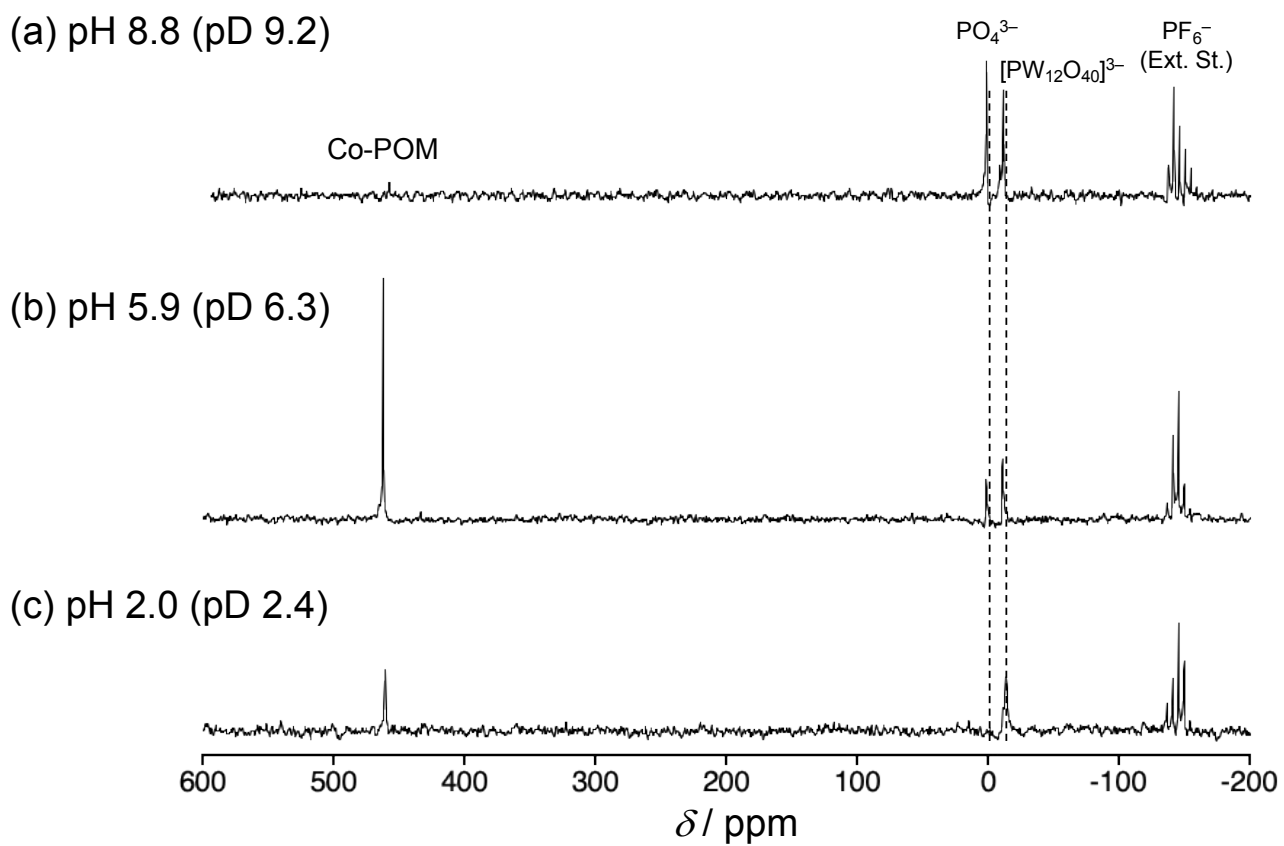

**Fig. S5**  $^{31}\text{P}$  NMR spectra of **Co-POM** (10 mM) in different pH (pD = 0.4 + pH reading) of  $\text{D}_2\text{O}$ . (a) pH 8.8, (b) pH 5.9, (c) pH 2.0.  $\text{KPF}_6$  in  $\text{D}_2\text{O}$  was used as an external standard.

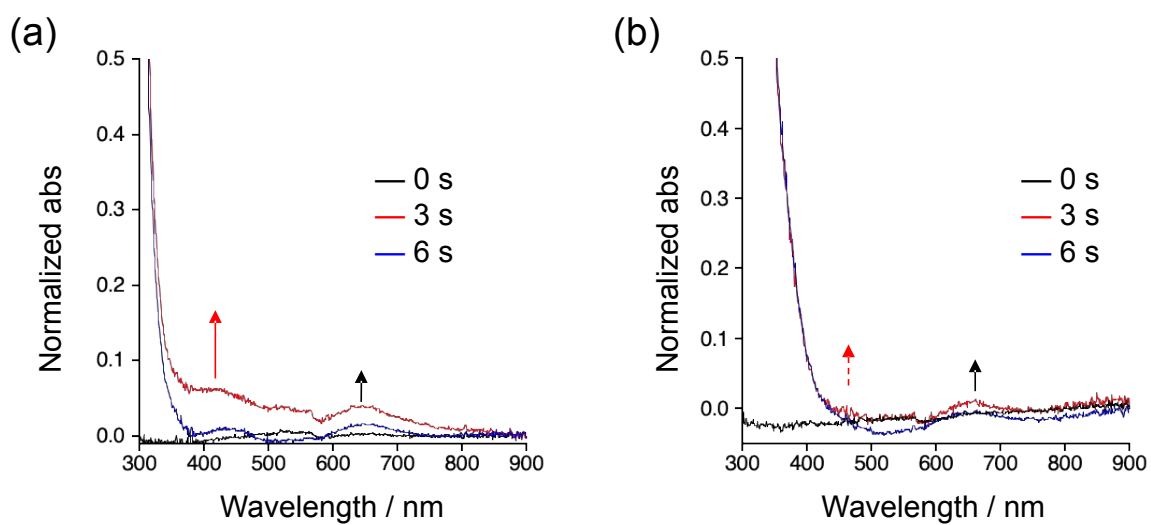

**Fig. S6** Normalized UV-vis absorption spectra of the initial reaction mixture (a) in the absence and (b) presence of EtBnS in water. Conditions: [Co-POM]: 0.20 mM, [NaHCO<sub>3</sub>]: 1.0 M, [Oxone<sup>®</sup>]: 0.30 M, [EtBnS]: 0.10 M, temp.: 30 °C.

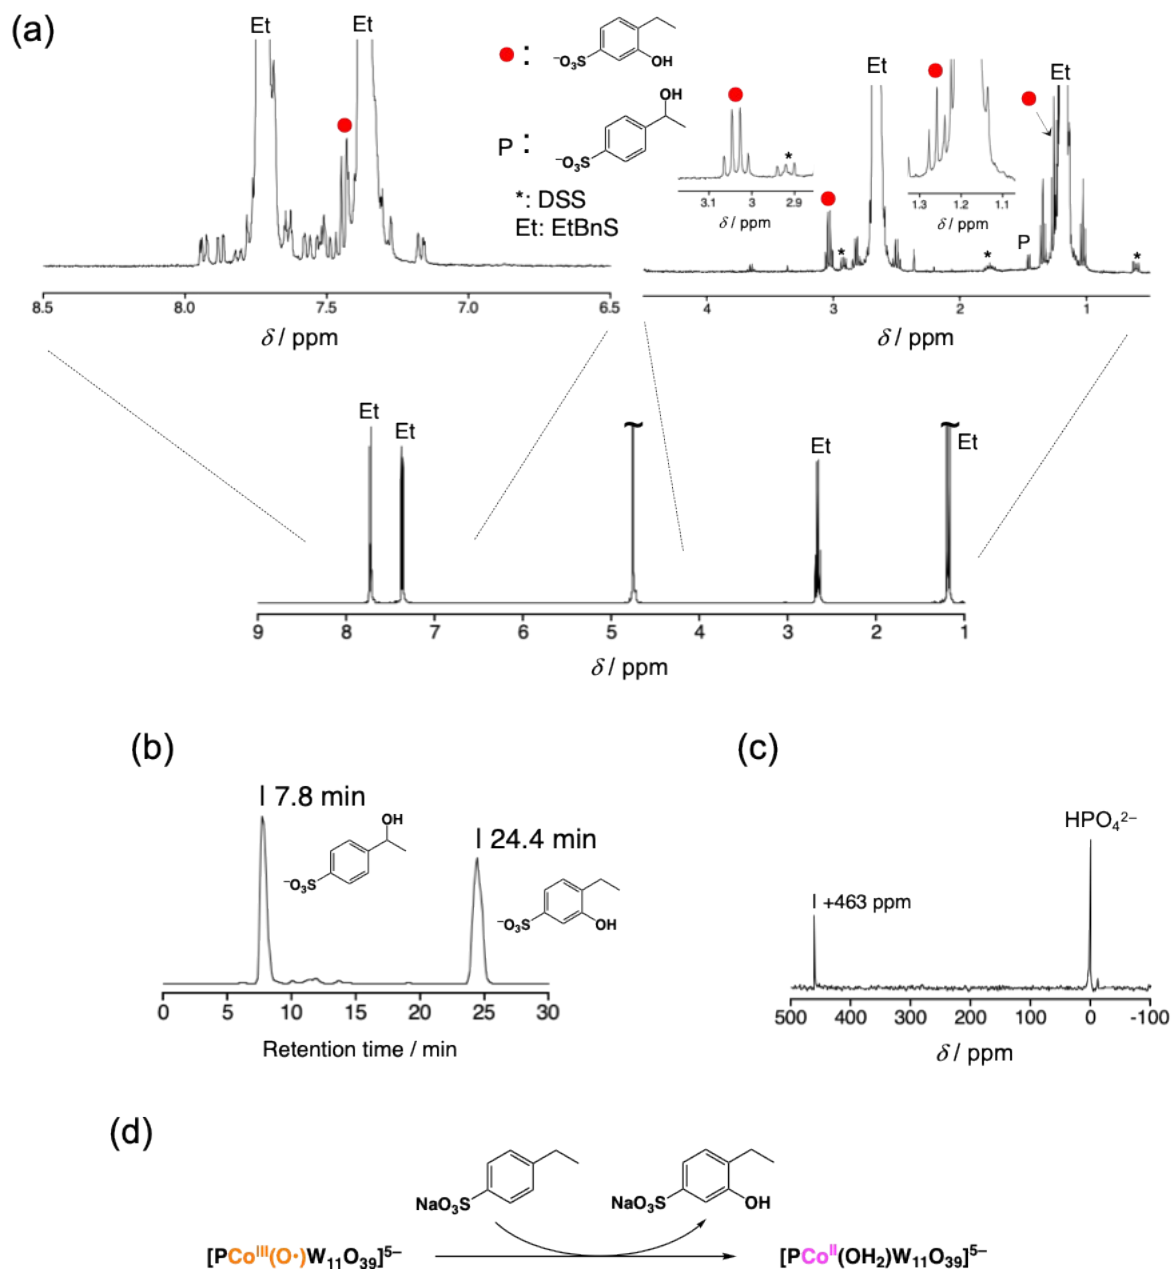

**Fig. S7** (a)  $^1\text{H}$  NMR spectrum of  $\text{D}_2\text{O}$  solution containing hydroxylated EtBnS obtained from the sub-stoichiometric oxidation of EtBnS by **Co-POM**. The sample of hydroxylated EtBnS was prepared as follows: Aqueous solution of  $\text{HSO}_5^-$  was titrated into the aqueous solution containing **Co-POM** (1.0 mM),  $\text{NaHCO}_3$  (20 mM). After addition of 14 mol equiv of  $\text{HSO}_5^-$ , 10 mol equiv of EtBnS was immediately added to the solution. The water was removed from the reaction mixture under vacuum and 1.0 mL of  $\text{D}_2\text{O}$  was added to the residue to replace the water. (b) LC-MS (MC at  $m/z = 200.9$ ) chart of the reaction mixture (50  $\mu\text{L}$ ) diluted with 950  $\mu\text{L}$  of water (eluent: water with 0.1% formic acid). (c) Paramagnetic  $^{31}\text{P}$  NMR spectrum of the reaction mixture in  $\text{D}_2\text{O}$  using  $\text{Na}_2\text{HPO}_4$  as an internal standard. The  $^{31}\text{P}$  NMR signal with the chemical shift of +463 ppm indicates the recovery of **Co-POM**. (d) Schematic representation of the sub-stoichiometric oxidation of EtBnS by the orange-brown species.



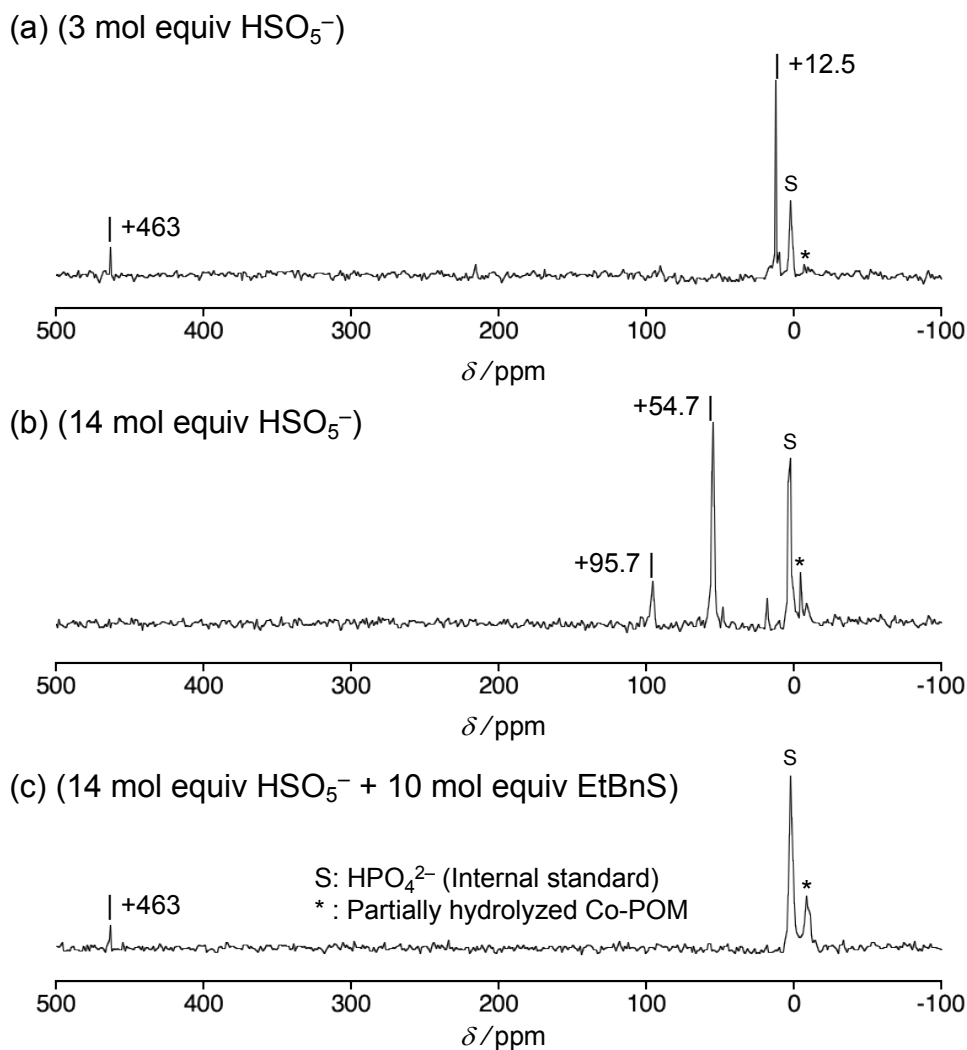

**Fig. S8**  $^{31}\text{P}$  NMR spectra for **Co-POM** (10 mM) in  $\text{D}_2\text{O}$  upon addition of (a) 3 mol equiv. of  $\text{HSO}_5^-$  and (b) 14 mol equiv of  $\text{HSO}_5^-$  in the presence of  $\text{NaHCO}_3$  (20 mM) and  $\text{Na}_2\text{SO}_4$  (50 mM). (c)  $^{31}\text{P}$  NMR spectrum of the solution (b) with addition of 10 mol equiv of EtBnS.

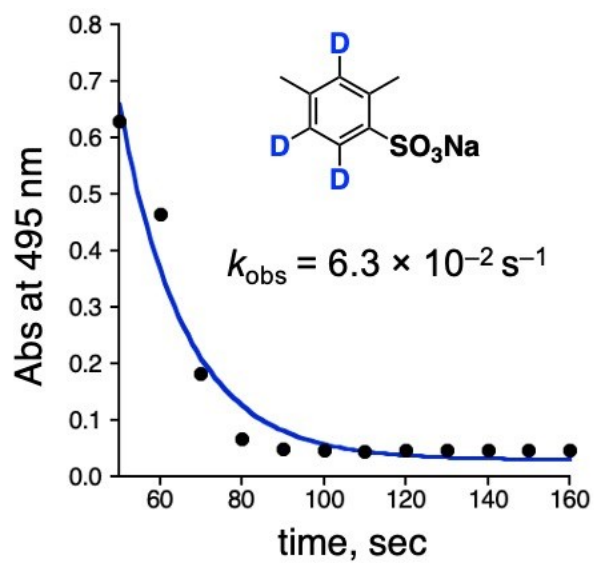

**Fig. S9** Time profiles of absorption decay of **Co-POM** in the presence of Oxone<sup>®</sup> monitored at 495 nm in sub-stoichiometric oxidation of *mXyS-d<sub>3</sub>*. [**Co-POM**]: 1.0 mM, [Oxone<sup>®</sup>]: 7.0 mM ([HSO<sub>5</sub><sup>-</sup>] = 14 mM), [*mXyS*] = [*mXyS-d<sub>3</sub>*]: 10 mM, [NaHCO<sub>3</sub>]: 10 mM, Temp.: 25 °C

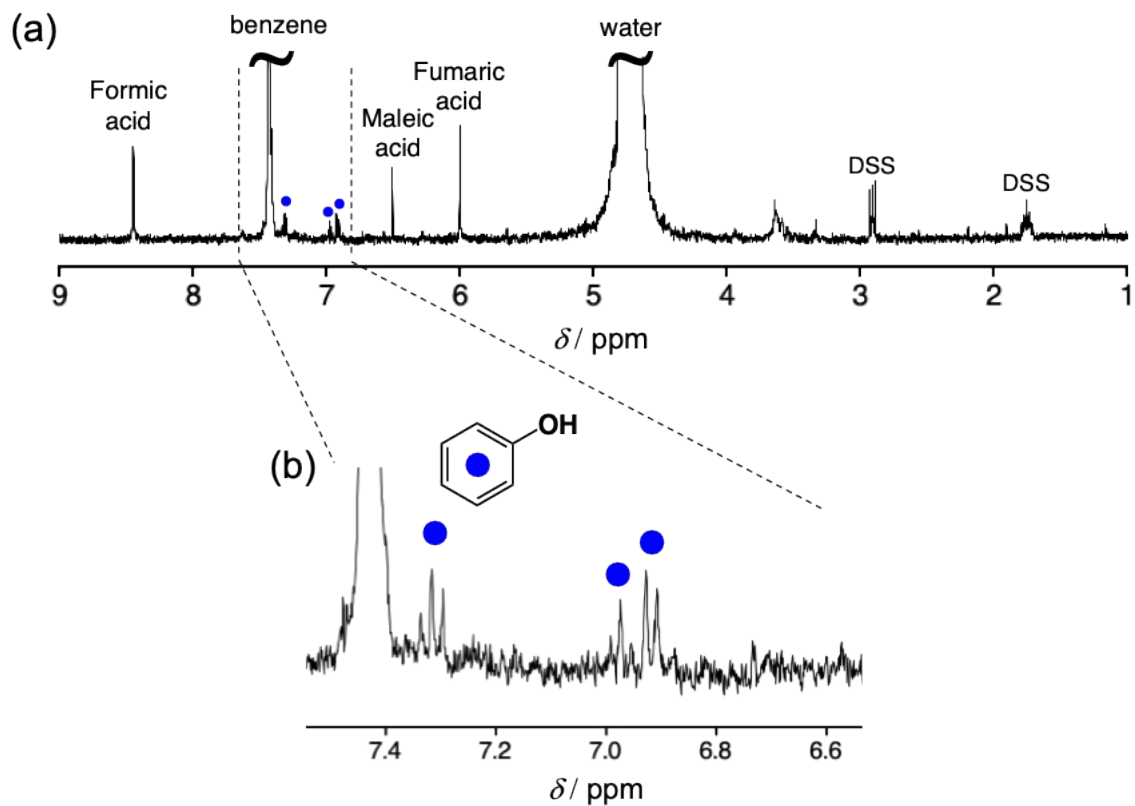

**Fig. S10** (a) <sup>1</sup>H NMR spectrum of the reaction mixture in the catalytic OAC reaction of benzene by **Co-POM** in D<sub>2</sub>O. [**Co-POM**]: 0.20 mM, [Oxone<sup>®</sup>]: 0.30 M, [NaHCO<sub>3</sub>]: 1.0 M, temp.: 30 °C, reaction time: 24 h. (b) Expanded region of the <sup>1</sup>H NMR spectrum from 6.5 to 7.6 ppm.

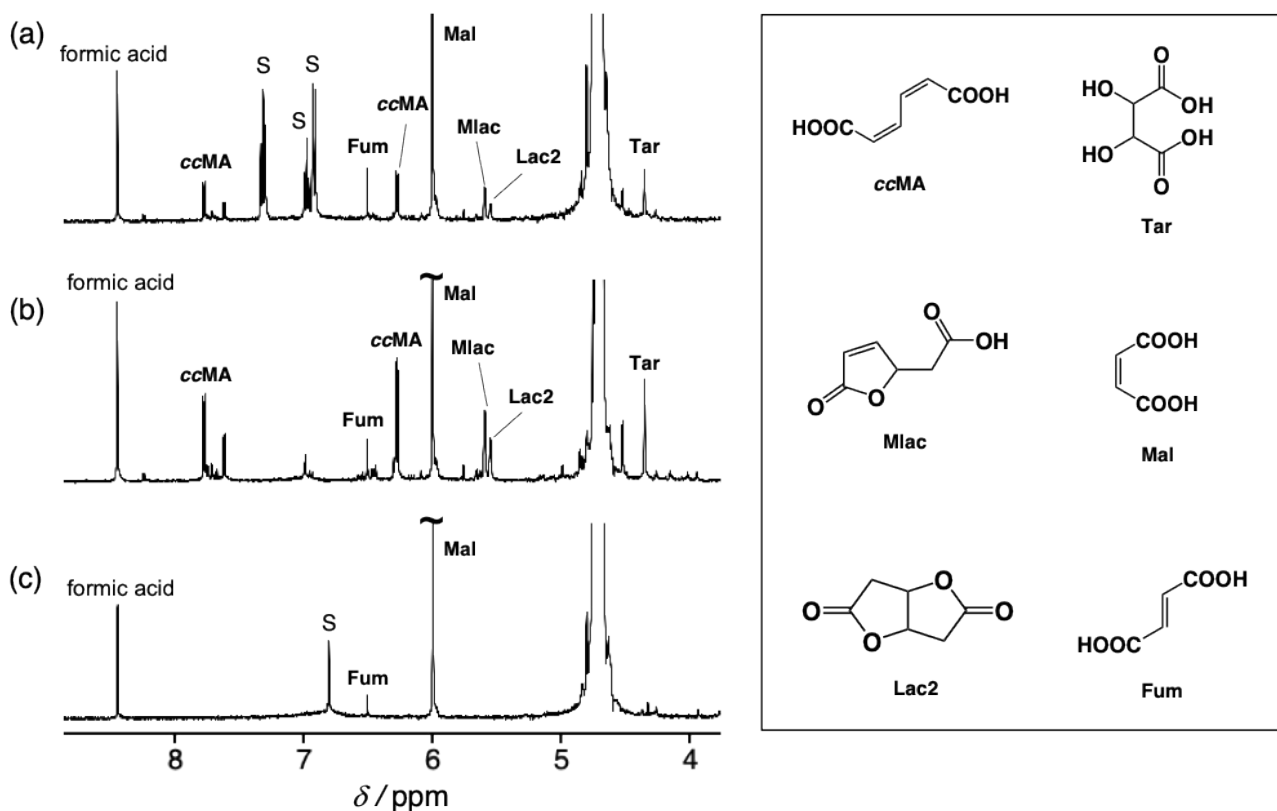

**Fig. S11**  $^1\text{H}$  NMR spectra of the reaction mixture obtained from the catalytic OAC reactions by **Co-POM** using (a) phenol, (b) catechol and (c) hydroquinone as substrates in  $\text{D}_2\text{O}$ . Conditions: [**Co-POM**]: 0.20 mM, [ $\text{NaHCO}_3$ ]: 1.0 M, [ $\text{Oxone}^\text{®}$ ]: 0.30 M, [Subst.]: 0.10 M, temp.: 30  $^\circ\text{C}$ , reaction time: 24 h.

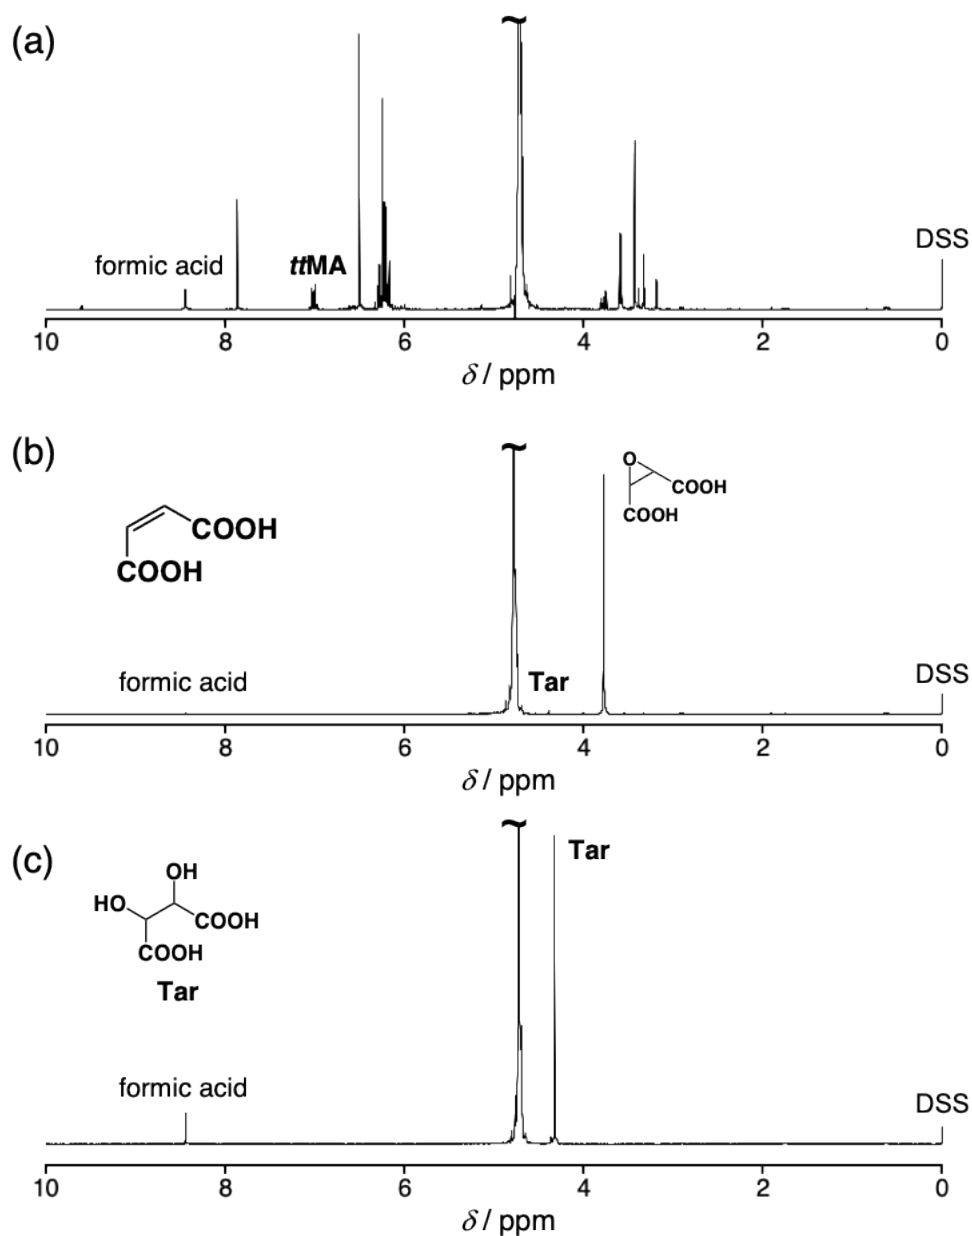

**Fig. S12** <sup>1</sup>H NMR spectra of reaction mixtures obtained from the catalytic OAC reactions by **Co-POM** using (a) *trans,trans*-muconic acid (**ttMA**), (b) maleic acid and (c) tartaric acid (**Tar**) as a substrate in D<sub>2</sub>O. Conditions: [**Co-POM**]: 0.20 mM, [NaHCO<sub>3</sub>]: 1.0 M, [Oxone<sup>®</sup>]: 0.30 M, [Subst.]: 0.10 M, temp.: 30 °C, reaction time: 24 h.

**Table S1.** TONs of the product obtained from the catalytic OAC reactions of EtBnS. <sup>a</sup>

| Entry          | Catalyst                                                                                                  | TON <sup>b</sup> (Yield, % <sup>c</sup> ) |           |          |          |          |
|----------------|-----------------------------------------------------------------------------------------------------------|-------------------------------------------|-----------|----------|----------|----------|
|                |                                                                                                           | 1                                         | 2         | 3        | 4        | 5        |
| 1              | <b>Co-POM</b>                                                                                             | 16 (3.1)                                  | 11 (2.2)  | 2 (0.4)  | 10 (2.0) | 31 (6.1) |
| 2              | <b>Co-POM</b> <sup>d</sup>                                                                                | 39 (7.8)                                  | 63 (12.6) | 11 (2.1) | 18 (3.5) | 20 (4.0) |
| 3              | –                                                                                                         | – (0.9)                                   | – (1.6)   | n.d.     | – (0.4)  | – (0.3)  |
| 4              | Co <sup>II</sup> (ClO <sub>4</sub> ) <sub>2</sub>                                                         | 36 (7.1)                                  | 42 (8.3)  | 1 (0.2)  | 1 (0.2)  | 4 (0.9)  |
| 5              | H <sub>3</sub> [PW <sub>12</sub> O <sub>40</sub> ]                                                        | 6 (1.1)                                   | 6 (1.1)   | n. d.    | 2 (0.3)  | 2 (0.4)  |
| 6              | Co <sup>II</sup> (ClO <sub>4</sub> ) <sub>2</sub> +<br>H <sub>3</sub> [PW <sub>12</sub> O <sub>40</sub> ] | 24 (4.8)                                  | 33 (6.6)  | 1 (0.2)  | 5 (1.0)  | 7 (1.4)  |
| 7              | Co <sup>II</sup> Cl <sub>2</sub> + Na <sub>2</sub> WO <sub>4</sub> +<br>Na <sub>2</sub> HPO <sub>4</sub>  | 25 (5.0)                                  | 34 (6.7)  | 1 (0.2)  | 5 (0.9)  | 8 (1.5)  |
| 8 <sup>e</sup> | Ru(II)-NHC <sup>f</sup>                                                                                   | 5 (1.0)                                   | 67 (14)   | 1 (0.1)  | 11 (2.3) | 6 (1.3)  |

<sup>a</sup> Conditions: [Catalyst] = 0.20 mM, [NaHCO<sub>3</sub>] = 1.0 M, [EtBnS] = 0.10 M, [Oxone<sup>®</sup>] = 0.30 M, Temp. = 30 °C, Solvent: D<sub>2</sub>O, reaction time: 24 h. <sup>b</sup> TON = [product]/[catalyst]. <sup>c</sup> Yield = ([product]/[EtBnS]) × 100. <sup>d</sup> No additive. <sup>e</sup> [Ru(II)-NHC] = 0.20 mM, [(NH<sub>4</sub>)<sub>2</sub>Ce<sup>IV</sup>(NO<sub>3</sub>)<sub>6</sub>] = 0.10 M, [EtBnS] = 0.10 M, Temp.: 30 °C, Solvent: D<sub>2</sub>O, reaction time: 24 h. <sup>f</sup> Ru(II)-NHC catalyst was synthesized according to the previous literature (ref 11 in the manuscript).

**Table S2.** Summary for total energies of optimized structures of  $[\text{PCo}(\text{O})\text{W}_{11}\text{O}_{39}]^{5-}$  under three spin states.

| Spin state    | Total energy (atomic unit) | $\langle S^2 \rangle$ | $\Delta E$ (kcal/mol) |
|---------------|----------------------------|-----------------------|-----------------------|
| Doublet state | -5481.498232               | 0.7951                | 6.303                 |
| Quartet state | -5481.503239               | 3.7796                | 3.161                 |
| Sextet state  | -5481.508277               | 8.7735                | 0.000                 |

**Table S3.** Cartesian coordinates of  $[\text{PCo}(\text{O})\text{W}_{11}\text{O}_{39}]^{5-}$  in the  $S = 1/2$  (doublet) state at the UB3LYP/LanL2TZ (W), 6-31G\* (Co), 6-31+G\* (O, P) level of theory.

| Atom | x / Å       | y / Å       | z / Å       |
|------|-------------|-------------|-------------|
| Co   | -0.17355023 | -0.11538287 | -3.40615965 |
| O    | 0.07818771  | 0.04283796  | -5.14532147 |
| O    | 4.56248987  | -0.06161278 | 2.59836804  |
| O    | 3.95387816  | 0.04740113  | -0.14965653 |
| O    | 2.54391416  | 1.64667779  | 1.50210509  |
| O    | 1.71052979  | -0.43587847 | 2.79285521  |
| O    | 3.10429525  | -2.07013914 | 1.21224763  |
| O    | 1.44240451  | -0.58160429 | -0.15492406 |
| O    | 2.72748074  | -4.56699715 | -0.10945948 |
| O    | 3.10902764  | -2.09984460 | -1.43251678 |
| O    | 0.65124918  | -3.10676921 | 1.21697744  |
| O    | 0.60983905  | -3.14592904 | -1.38288521 |
| O    | 0.21976722  | 0.14677769  | 5.16042296  |
| O    | -0.48739312 | -1.88455969 | 3.29731329  |
| O    | -1.92069006 | 0.33027745  | 3.29567433  |
| O    | 0.30073371  | 1.74220544  | 2.78959514  |
| O    | -0.75222199 | -0.48773929 | 1.11259022  |
| O    | 1.81300488  | 4.18924038  | 2.59152727  |
| O    | -0.61552228 | 3.68096419  | 1.20484661  |
| O    | 1.66269552  | 3.58464438  | -0.15636395 |
| O    | 0.05968524  | 1.55167160  | -0.15818442 |
| O    | 4.45081739  | -0.11979975 | -3.01145426 |
| O    | 1.67719850  | -0.47443770 | -3.06448400 |
| O    | 2.55890982  | 1.65419498  | -1.76081932 |
| O    | -1.61654130 | -4.36383564 | 2.42233090  |
| O    | -1.60448958 | -3.01627128 | -0.07616805 |
| O    | -2.79902238 | -1.80962978 | 2.02238260  |
| O    | 1.71570045  | 4.10290525  | -3.01551709 |
| O    | 0.25948102  | 1.71638277  | -3.07428439 |
| O    | -0.64120693 | 3.68884324  | -1.44078981 |
| O    | -1.66467419 | -4.39379030 | -2.65025437 |
| O    | -0.60198785 | -1.97635488 | -3.51791970 |
| O    | -2.88747546 | -1.86917265 | -2.10214318 |
| O    | -0.74835398 | -0.48684102 | -1.43524791 |
| O    | -4.64546911 | 0.31633143  | 2.42042240  |
| O    | -2.56724632 | 1.86940337  | 1.21597977  |
| O    | -3.40982257 | -0.22696782 | -0.07592630 |
| O    | -3.04660000 | 4.36075954  | -0.11523197 |
| O    | -2.62498042 | 1.84541798  | -1.38380944 |
| O    | -2.05130025 | 0.26152259  | -3.51422250 |
| O    | -4.69429494 | 0.27900800  | -2.65303868 |
| P    | 0.00147790  | -0.00088364 | -0.15459402 |
| W    | 3.19496221  | -0.16977902 | 1.54840698  |
| W    | 1.15419375  | 2.98378906  | 1.54418832  |
| W    | 3.06975351  | -0.19798518 | -1.96922892 |
| W    | -1.17987559 | -2.83816830 | 1.73870005  |
| W    | 1.07851520  | 2.87596698  | -1.97271706 |
| W    | -1.21201882 | -2.84005620 | -2.04131983 |
| W    | -3.07479116 | 0.08877903  | 1.73703164  |
| W    | -3.09064871 | 0.05783445  | -2.04437033 |
| W    | -1.89007313 | 3.07900687  | -0.13381425 |
| W    | 2.03573406  | -2.98526441 | -0.12971178 |
| W    | -0.03117611 | -0.01744945 | 3.45917229  |



**Table S4.** Cartesian coordinates of  $[\text{PCo}(\text{O})\text{W}_{11}\text{O}_{39}]^{5-}$  in the  $S = 3/2$  (quartet) state at the UB3LYP/LanL2TZ (W), 6-31G\* (Co), 6-31+G\* (O, P) level of theory.

| Atom | x / Å       | y / Å       | z / Å       |
|------|-------------|-------------|-------------|
| Co   | -0.17099450 | -0.11642308 | -3.52139733 |
| O    | 0.03000961  | 0.01783794  | -5.09780616 |
| O    | 4.55780047  | -0.06988925 | 2.63643203  |
| O    | 3.97516803  | 0.05419111  | -0.11335354 |
| O    | 2.54543373  | 1.64631497  | 1.51371203  |
| O    | 1.70930291  | -0.43040195 | 2.80606938  |
| O    | 3.09648420  | -2.06548068 | 1.22676113  |
| O    | 1.44974902  | -0.58320442 | -0.17874470 |
| O    | 2.72094155  | -4.55641375 | -0.11787401 |
| O    | 3.15240219  | -2.09676941 | -1.41071696 |
| O    | 0.65021820  | -3.09745548 | 1.20392505  |
| O    | 0.60977684  | -3.12682949 | -1.39754255 |
| O    | 0.21501536  | 0.14559706  | 5.17508148  |
| O    | -0.47793126 | -1.87693714 | 3.28961427  |
| O    | -1.90861373 | 0.33144011  | 3.29229674  |
| O    | 0.30113142  | 1.74388386  | 2.79852933  |
| O    | -0.76235967 | -0.49685307 | 1.05675258  |
| O    | 1.80665565  | 4.18865395  | 2.60352053  |
| O    | -0.61079920 | 3.66894571  | 1.19901174  |
| O    | 1.67186935  | 3.58315887  | -0.14689983 |
| O    | 0.06643883  | 1.54790891  | -0.18332375 |
| O    | 4.53375083  | -0.09785992 | -2.96800278 |
| O    | 1.77741818  | -0.51219356 | -3.06732344 |
| O    | 2.58479429  | 1.65857013  | -1.76795738 |
| O    | -1.60731341 | -4.35787447 | 2.41795690  |
| O    | -1.61029676 | -3.00939201 | -0.07984204 |
| O    | -2.79289624 | -1.80629650 | 2.03111350  |
| O    | 1.74221343  | 4.11670317  | -2.99522275 |
| O    | 0.27097584  | 1.74056904  | -3.07247078 |
| O    | -0.63284960 | 3.68593015  | -1.44358890 |
| O    | -1.69155751 | -4.41349817 | -2.60952879 |
| O    | -0.62981361 | -2.03974861 | -3.55666890 |
| O    | -2.89480363 | -1.86344605 | -2.10465000 |
| O    | -0.72332043 | -0.47293828 | -1.51079147 |
| O    | -4.64082690 | 0.32442984  | 2.43500001  |
| O    | -2.56176498 | 1.86831847  | 1.21628146  |
| O    | -3.42569516 | -0.23481984 | -0.06019315 |
| O    | -3.03669108 | 4.35766735  | -0.12223549 |
| O    | -2.64994936 | 1.83914985  | -1.38059598 |
| O    | -2.20896028 | 0.30041496  | -3.54721758 |
| O    | -4.79457295 | 0.25210601  | -2.57425855 |
| P    | 0.00674292  | -0.00528325 | -0.19927878 |
| W    | 3.19998979  | -0.17382826 | 1.57288353  |
| W    | 1.15448138  | 2.97974437  | 1.55581701  |
| W    | 3.12952294  | -0.18631012 | -1.95386048 |
| W    | -1.17649694 | -2.83095237 | 1.73199605  |
| W    | 1.10291252  | 2.88317946  | -1.96030503 |
| W    | -1.22543741 | -2.84682197 | -2.04444712 |
| W    | -3.07662499 | 0.09209116  | 1.73648478  |
| W    | -3.15631419 | 0.05728662  | -2.04803211 |
| W    | -1.88739197 | 3.06948477  | -0.14573815 |
| W    | 2.03865323  | -2.97042147 | -0.14123138 |
| W    | -0.03107697 | -0.01553528 | 3.47245987  |

**Table S5.** Cartesian coordinates of  $[\text{PCo}(\text{O})\text{W}_{11}\text{O}_{39}]^{5-}$  in the  $S = 5/2$  (sextet) state at the UB3LYP/LanL2TZ (W), 6-31G\* (Co), 6-31+G\* (O, P) level of theory.

| Atom | x / Å       | y / Å       | z / Å       |
|------|-------------|-------------|-------------|
| Co   | -0.13441920 | -0.09204102 | -3.72001540 |
| O    | 0.05384915  | 0.04034213  | -5.42498630 |
| O    | 4.56260913  | -0.06008099 | 2.61030958  |
| O    | 3.94740223  | 0.05075150  | -0.13555962 |
| O    | 2.54821657  | 1.64961773  | 1.51850106  |
| O    | 1.71266550  | -0.43401355 | 2.80727104  |
| O    | 3.10355767  | -2.06686656 | 1.21870726  |
| O    | 1.42742680  | -0.58417995 | -0.15363236 |
| O    | 2.72310981  | -4.55500915 | -0.10070500 |
| O    | 3.10636853  | -2.09144362 | -1.43189171 |
| O    | 0.64849583  | -3.10599162 | 1.22607319  |
| O    | 0.60876461  | -3.13403669 | -1.37571733 |
| O    | 0.21848822  | 0.14438504  | 5.17065334  |
| O    | -0.48503204 | -1.89175972 | 3.32269002  |
| O    | -1.92318363 | 0.33493249  | 3.31723959  |
| O    | 0.30001204  | 1.74401290  | 2.80062005  |
| O    | -0.74055361 | -0.48565096 | 1.16464374  |
| O    | 1.80853459  | 4.18834065  | 2.60511782  |
| O    | -0.61312756 | 3.68672880  | 1.20884137  |
| O    | 1.66442048  | 3.56974824  | -0.14322494 |
| O    | 0.04154387  | 1.54183673  | -0.14736731 |
| O    | 4.49718805  | -0.10630431 | -2.96836942 |
| O    | 1.73692197  | -0.48137812 | -3.12837042 |
| O    | 2.54190368  | 1.63616841  | -1.77596210 |
| O    | -1.61804164 | -4.36508618 | 2.43479736  |
| O    | -1.61237438 | -3.00772135 | -0.05493790 |
| O    | -2.80290768 | -1.81240273 | 2.05375721  |
| O    | 1.73696123  | 4.11773376  | -2.98017454 |
| O    | 0.26521444  | 1.74064877  | -3.09697198 |
| O    | -0.63489257 | 3.68362111  | -1.43892079 |
| O    | -1.67146762 | -4.39236659 | -2.59523370 |
| O    | -0.59261504 | -2.01348063 | -3.53607128 |
| O    | -2.88423608 | -1.86529349 | -2.13197900 |
| O    | -0.80616434 | -0.52191006 | -1.37613305 |
| O    | -4.64572620 | 0.31819894  | 2.43151500  |
| O    | -2.56661376 | 1.87005222  | 1.22469268  |
| O    | -3.40049778 | -0.23599821 | -0.05446613 |
| O    | -3.04082071 | 4.35314429  | -0.10939318 |
| O    | -2.61646547 | 1.84168593  | -1.38003954 |
| O    | -2.09861555 | 0.28512711  | -3.54725706 |
| O    | -4.70174462 | 0.27348795  | -2.59252660 |
| P    | -0.02419050 | -0.01623607 | -0.14096738 |
| W    | 3.19286151  | -0.16435395 | 1.56228338  |
| W    | 1.15076454  | 2.97792140  | 1.56251923  |
| W    | 3.08636127  | -0.20292105 | -1.96850842 |
| W    | -1.18578649 | -2.83592657 | 1.75527134  |
| W    | 1.08067324  | 2.88260360  | -1.95968731 |
| W    | -1.20790028 | -2.82490378 | -2.02747909 |
| W    | -3.07373569 | 0.08448777  | 1.75241352  |
| W    | -3.07672028 | 0.05991971  | -2.03682871 |
| W    | -1.88504649 | 3.07029116  | -0.11982306 |
| W    | 2.02929679  | -2.97385056 | -0.11406141 |
| W    | -0.03623256 | -0.02488089 | 3.46994374  |
